# Supplementary material
Source: MDPI journal article supplement (https://www.mdpi.com/2075-163X/12/12/1608)

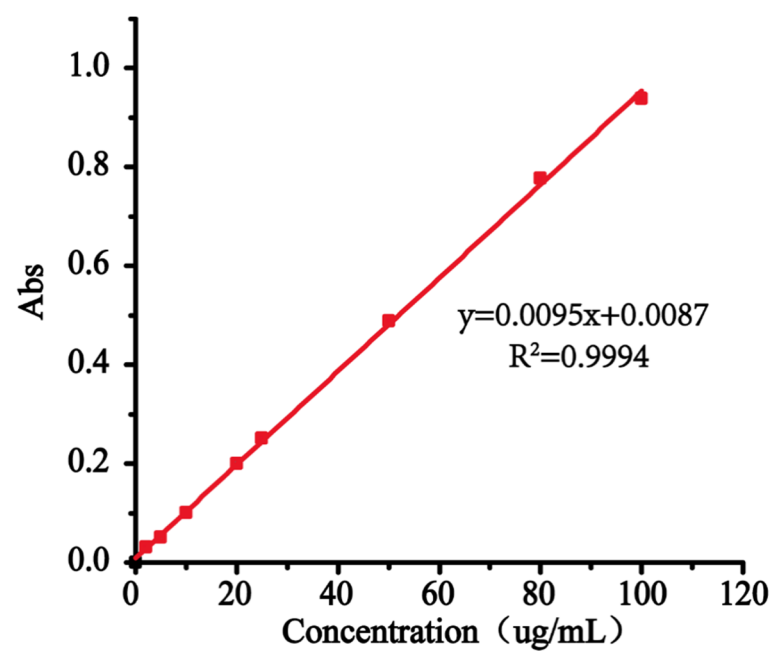

Figure S1 Standard curve of DOX

Supplement: s1 [file s1 › minerals-1990493-supplementary.pdf]
